# Supplementary material
Source: PubMed Central journal article supplement (PMC10872254)
Supplement: NIHMS1959617-supplement-Supplementary_Information.pdf [file NIHMS1959617-supplement-Supplementary_Information.pdf]

Supporting Information for:

# Impact of Disease-Associated Mutations on the Deaminase Activity of ADAR1

Agya Karki<sup>1</sup>, Kristen B Campbell<sup>1</sup>, Sukanya Mozumder<sup>1,2</sup>, Andrew J. Fisher<sup>1,2</sup> & Peter A. Beal\*<sup>1</sup>

<sup>1</sup>Department of Chemistry, University of California, Davis, CA, USA 95616.

<sup>2</sup>Department of Molecular and Cellular Biology, University of California, Davis, CA, USA 95616.

\*Corresponding author, Email: [pabeal@ucdavis.edu](mailto:pabeal@ucdavis.edu)

Contents:

|                                                                                             |     |
|---------------------------------------------------------------------------------------------|-----|
| <b>Table S1.</b> Oligonucleotide sequences used in this work .....                          | S2  |
| <b>Table S2.</b> Oligonucleotide observed and expected masses.....                          | S2  |
| <b>Table S3.</b> PCR and sequencing primers for oligonucleotides.....                       | S3  |
| <b>Table S4.</b> Site-directed mutagenesis primers for ADAR1 constructs.....                | S3  |
| <b>Table S5.</b> Sequencing primers for ADAR1 constructs.....                               | S3  |
| <b>Figure S1.</b> SDS-PAGE gels showing purified ADAR1 proteins.....                        | S4  |
| <b>Figure S2.</b> Secondary structure prediction of hGli1 substrate RNA.....                | S5  |
| <b>Figure S3.</b> Secondary structure prediction of 5-HT <sub>2C</sub> R substrate RNA..... | S6  |
| <b>Figure S4.</b> Progress curves for kinetic analyses .....                                | S7  |
| <b>Figure S5.</b> Representative gel shift of ADAR1 p110 and AGS mutants .....              | S8  |
| <b>Figure S6.</b> Competitive inhibition of ADAR1 p110 with AGS mutants .....               | S9  |
| <b>Figure S7.</b> Representative gel shift of ADAR1 R3D and AGS mutants .....               | S10 |
| <b>Figure S8.</b> Gel shift analysis of ADAR1d E1008Q and ADAR1d E1008Q G1007R .....        | S11 |

**Table S1.** Oligonucleotide sequences used in this work. All bases are ribonucleotides unless specified. **N** is 8-azanebularine.

| Oligonucleotide Name                             | Sequence                                                                                                                                                                                                                                                                                                                                                                                   |
|--------------------------------------------------|--------------------------------------------------------------------------------------------------------------------------------------------------------------------------------------------------------------------------------------------------------------------------------------------------------------------------------------------------------------------------------------------|
| 32 nt 8-azanebularine top                        | 5'- GCUCGCGAUGCUN <sup>N</sup> GAGGGCUCUGAUAGCUACG -3'                                                                                                                                                                                                                                                                                                                                     |
| 32 nt bottom                                     | 5'- CGUAGCUAUCAGAGCCCCCAGCAUCGCGAGC-3'                                                                                                                                                                                                                                                                                                                                                     |
| (3' end Cy5 label)<br>61 mer 8-azanebularine top | 5'- AGCAAGUCCACGUGCAUUGGCUCGCGAUGCUN <sup>N</sup> GAGGGCUCUGAUAGCGGAUGGACAUCGACG <sup>Cy5</sup> -3'                                                                                                                                                                                                                                                                                        |
| 61 mer bottom                                    | 5'- CGUCGAUGUCCAUCCGCUAUCAGAGCCCCCAGCAUCGCGAGCCAUGCACGUGGACUUGCU -3'                                                                                                                                                                                                                                                                                                                       |
| 23 nt 8-azanebularine top                        | 5'- GCUCGGAGAAUUN <sup>N</sup> GCGGGUCGUG -3'                                                                                                                                                                                                                                                                                                                                              |
| 23 nt bottom                                     | 5'- CACGACCCGCCAAUUCUCCGAGC -3'                                                                                                                                                                                                                                                                                                                                                            |
| <i>5HT<sub>2cR</sub></i><br>332 nt               | 5'- UGGGUACGAAUCCCACUACGUACAAGCUUACCUAGAU<br>AUUUGUGCCCCGUCUGGAUUUCUUUAGAUGUUUUUUUUC<br>AACAGCGUCCAUCAUGCACCUCUGCGCUAUAUCGCUGGAUC<br>GGUAUGUAGCAAU <sup>A</sup> CGUAAUCCUAUUGAGCAUAGCCGUUU<br>CAAUUCGCGGACUAAGGCCAUCAUGAAGAUUGCUAUUGUU<br>UGGGCAAUUUCUAUAGGUAAAUAACUUUUUGGCCAUA<br>GAAUUGCAGCGGCUAUGCUCAAUACUUUCGGAUUAUGUAC<br>UGUGAACACGUACAGACGUCGACUGGUAACAUUUGCGUU<br>UGAUCGGGUUCU -3' |
| <i>hGli1</i><br>155 nt                           | 5'- CAGAACUUUGAUCCUACCUC <sup>C</sup> CAACCUCUGUCUCUCUG<br>UCUACUCACCACAGCCCCCAGCAUCACUGAGAAUGCUGCC<br>AUGGAUGCUN <sup>A</sup> GAGGGCUACAGGAAGAGCCAGAAGUUGGGA<br>CCUCCAUGGUGGGCAGUGGUCUGAACCCCUAUAUG -3'                                                                                                                                                                                   |

**Table S2.** Observed and calculated masses of oligonucleotides.

| Oligonucleotide Name                                  | Observed Mass (m/z) | Expected mass (a.m.u.) |
|-------------------------------------------------------|---------------------|------------------------|
| 32 nt 8-azanebularine top                             | 10329               | 10328                  |
| 32 nt bottom                                          | 10203               | 10206                  |
| (For 61 bp, top 5' fragment)<br>38 nt 8-azanebularine | 12303               | 12304                  |
| (For 61 bp, top 3' fragment)<br>23 nt                 | 6994                | 6991                   |
| 23 bp 8-azanebularine top                             | 7456                | 7446                   |
| 23 bp bottom                                          | 7250                | 7241                   |

**Table S3.** RT-PCR and sequencing DNA primers used for in vitro deamination in this work.

| <b>Oligonucleotide Primers</b>         | <b>Sequence</b>                                   |
|----------------------------------------|---------------------------------------------------|
| <i>5HT<sub>2c</sub>R</i><br>RT Forward | 5'- TGGGTACGAATTCCCCTTACGTACAAGCTT -3'            |
| <i>5HT<sub>2c</sub>R</i><br>Reverse    | 5'- AGAACCCGATCAAACGCAAATGTTAC -3'                |
| <i>hGli1</i><br>RT Forward             | 5'- TAATACGACTCACTATAGGGCAGAACTTTGATCCTTACCTC -3' |
| <i>hGli1</i><br>Reverse                | 5'- CATATAGGGGTTTCAGACCACTG -3'                   |

**Table S4.** Primers used for site-directed mutagenesis of ADAR1 R3D, ADAR1d, ADAR1 p110.

| <b>Mutant</b>     | <b>Sequence</b>                                          |
|-------------------|----------------------------------------------------------|
| Y1112F<br>Forward | 5'- GGTTGGTAGAGTTTCTATCTTCGACTCTAAGAGACAATCTGG -3'       |
| Y1112F<br>Reverse | 5'- CCAGATTGTCTCTTAGAGTCGAAGATAGAACTCTACCAACC -3'        |
| G1007R<br>Forward | 5'- GTTGAGAACTAAGGTTGAAAACAGAGAAGGTACTATCCCAGTTGAATC -3' |
| G1007R<br>Reverse | 5'- GATTCAACTGGGATAGTACCTTCTCTGTTTTCAACCTTAGTTCTCAAC -3' |
| K999N<br>Forward  | 5'- CGAAAACCCAAAGCAAGGTAAGTTGAGAACTAAGGTTGAAAAC -3'      |
| K999N<br>Reverse  | 5'- GTTTTCAACCTTAGTTCTCAAGTTACCTTGCTTTGGGTTTTTCG -3'     |
| R892H<br>Forward  | 5'- GTTTCTTTGGGTACTGGTAACCACTGTGTTAAGGGTGACTCTTTGTC -3'  |
| R892H<br>Reverse  | 5'- GACAAAGAGTCACCCTTAACACAGTGGTTACCAGTACCCAAAGAAAC -3'  |

**Table S5.** Sequencing DNA primers for ADAR1 p110, ADAR1 R3D, and ADAR1d constructs.

| <b>Oligonucleotide Primers</b> | <b>Sequence</b>                    |
|--------------------------------|------------------------------------|
| <i>Galpromoterfor</i>          | 5'- ATGTAAAGAGCCCCATTATCTTAGCC -3' |
| <i>Zdomainfor</i>              | 5'- CTACACCACCAATTTGGCATTGACTG -3' |
| <i>ADAR1 R3D for</i>           | 5'- GAGCTATTATGGAAATGCCATCCTTC-3'  |
| <i>ADAR1 R2D for</i>           | 5'- CAAACTCCAACACCATCTGCTAC -3'    |
| <i>ADAR1 R1D for</i>           | 5'-CACTAATCCAGTTGGTGGTTTATTGG-3'   |
| <i>ADAR1d for</i>              | 5'-TTGCCATTGACTGGTTCTACTTTCCAC-3'  |
| <i>ADAR1d for 2</i>            | 5'- GGGTGAAAGATTGAGAACTATGTC-3'    |
| <i>Intein CBD for</i>          | 5'- CTCTACTTGTGTCCAGTTGCAATG -3'   |
| <i>Vector rev</i>              | 5'- TTTTCTCGGGCAGATCTTTGTC -3'     |

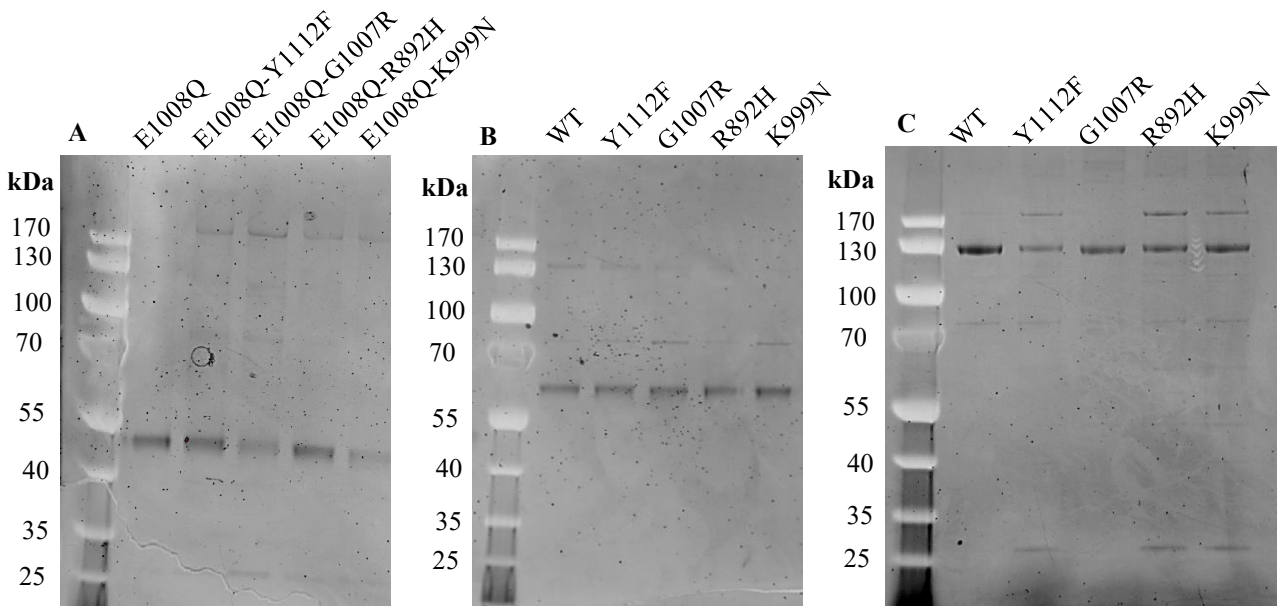

**Figure S1.** SDS-PAGE gels for three ADAR1 constructs (A) ADAR1d = 44 kDa (B) ADAR1 R3D = 58 kDa, and (C) ADAR1 p110 = 105 kDa overexpression and purification. The first lane of each gel was loaded with 10 uL of PageRuler Prestained Ladder from ThermoFisher and each lane to the right of the ladder was added ~ 0.5 ug of ADAR1 construct in an Invitrogen NuPAGE 4-12% Bolt Bis-Tris Plus gel. Gel components consisted of 50 mM MOPS, 50 mM Tris Base, 0.1% SDS, 1 mM EDTA, pH 7.7 and the gel was run at 200V for 45 minutes.

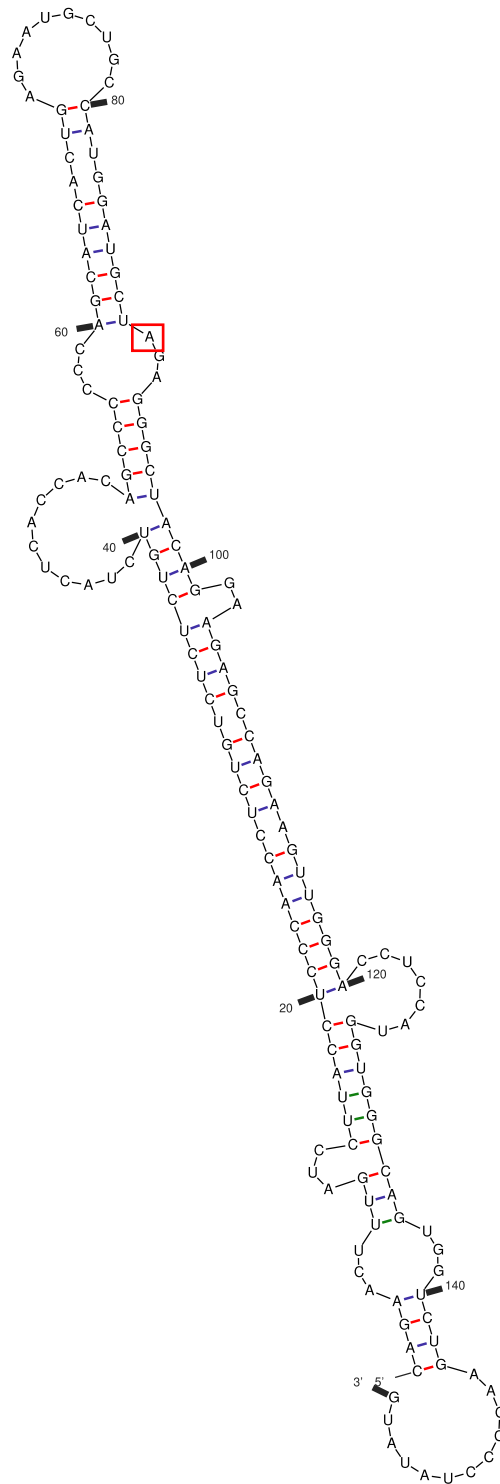

**Figure S2.** Predicted secondary structure for hGli1-derived substrate RNA. Target adenosine is highlighted with red box.

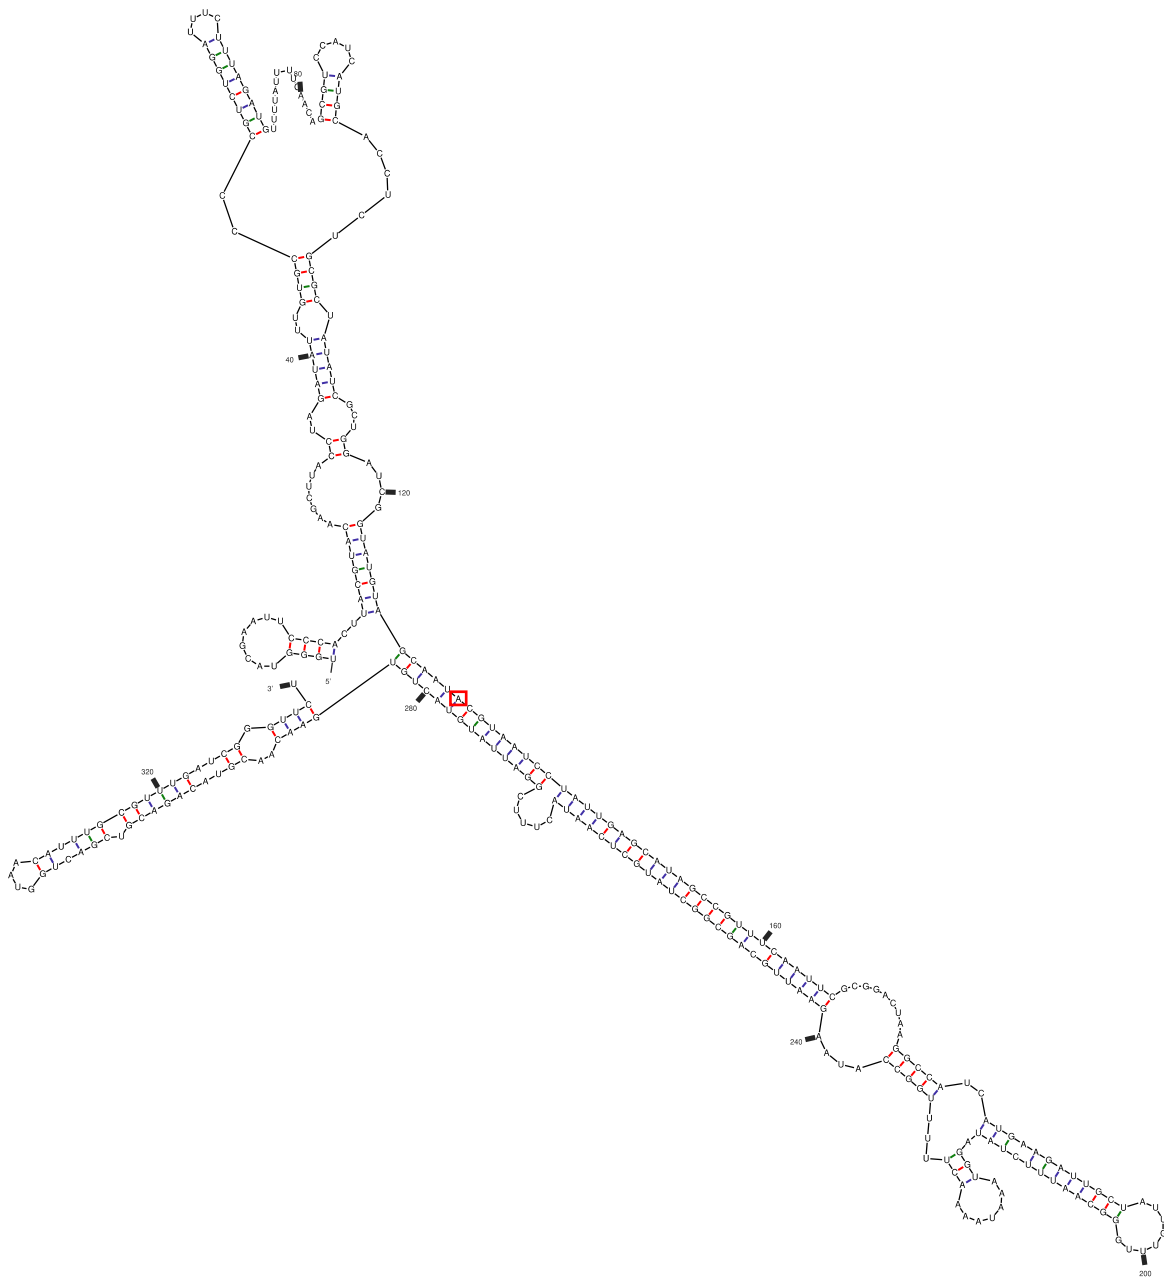

**Figure S3.** Predicted secondary structure for 5-HT<sub>2c</sub>R-derived substrate RNA. Target adenosine is highlighted with red box.

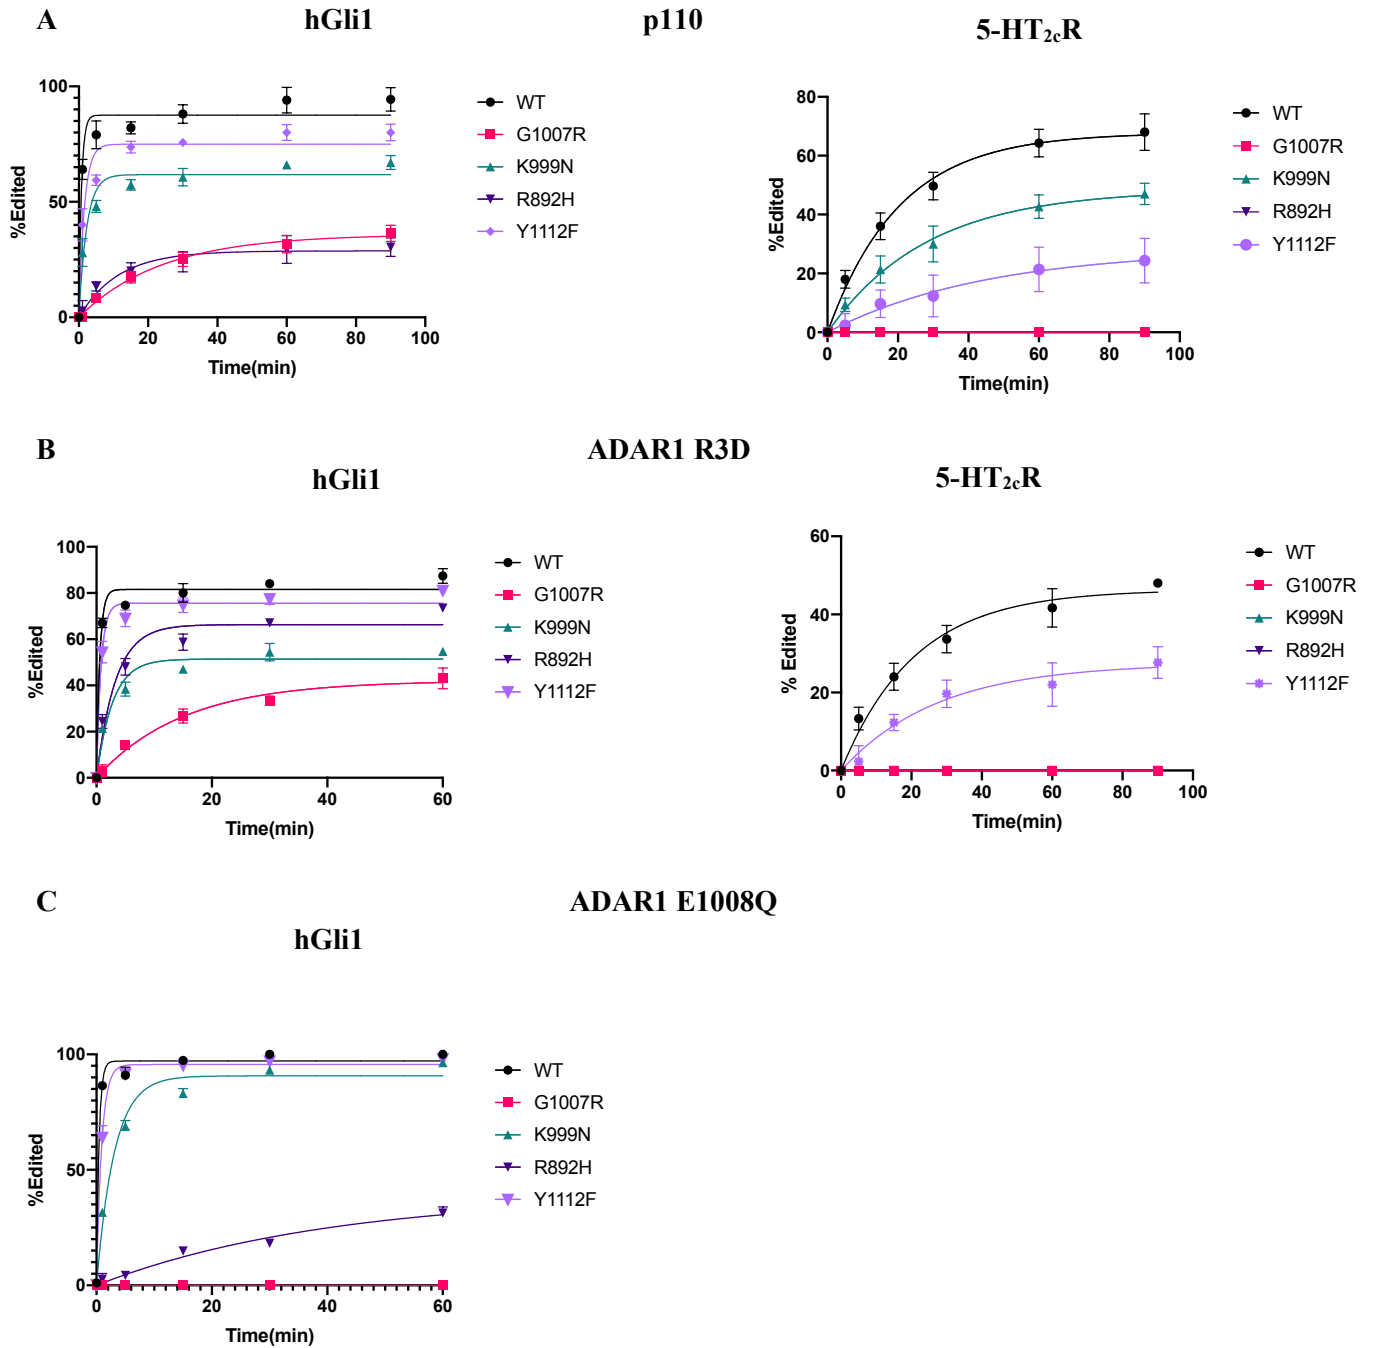

**Figure S4.** Progress curves for reactions of (A) full-length p110, (B) ADAR1 R3D, and (C) ADAR1d E1008Q with hGli1 and 5HT<sub>2c</sub>R substrate, B site. Reactions were performed under single turn over conditions with 100 nM [enzyme] and 10 nM [substrate]. Plotted values are the means of three technical replicates  $\pm$  standard deviation for each time point.

**A** 5'-AGCAAGUCCACGUGCAUGGCUCGCGAUGCUN<sup>N</sup>GAGGGCUCUGAUAGCGGAUGGACAUCGACGCy5-3'  
 3'-UCGUUCAGGUGCACGUACCGAGCGCUACGACCCCCGAGACUAUCGCCUACCUUGUAGCUGC-5'

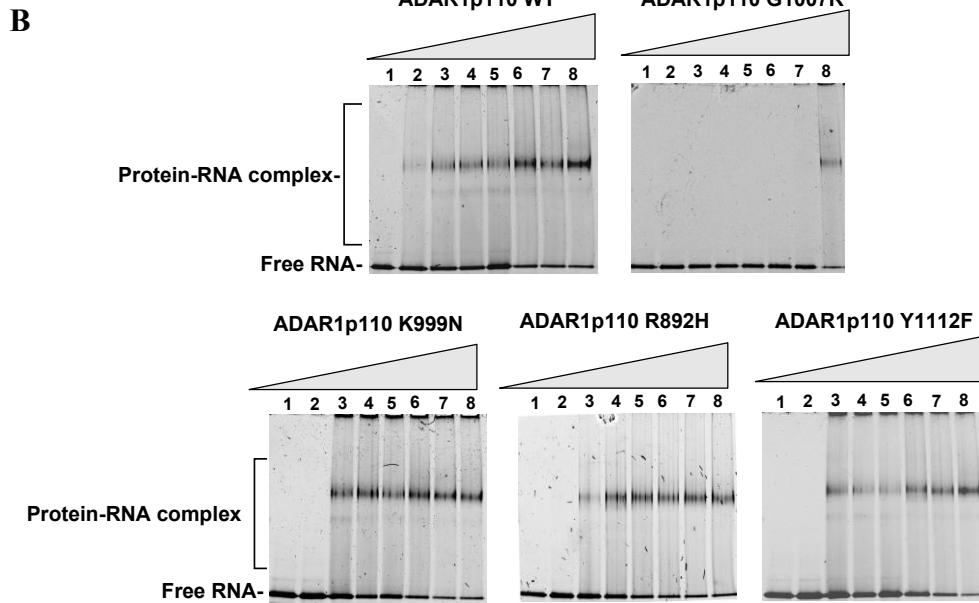

**Figure S5.** Binding of AGS mutants of ADAR1 p110 to a 61 bp duplex bearing 8-azanebularine (N) analyzed by EMSA. **(A)** Sequence of 61 bp RNA duplex with the adenosine analog 8-azanebularine (N). N allows for trapping of the protein-RNA complex in the base-flipped conformation<sup>28,29</sup>. The sequence is labeled with Cy5 at the 3' end. **(B)** Representative EMSA gels of p110 WT and AGS mutants (G1007R, K999N, R892H, and Y1112F) with the 61 bp duplex.



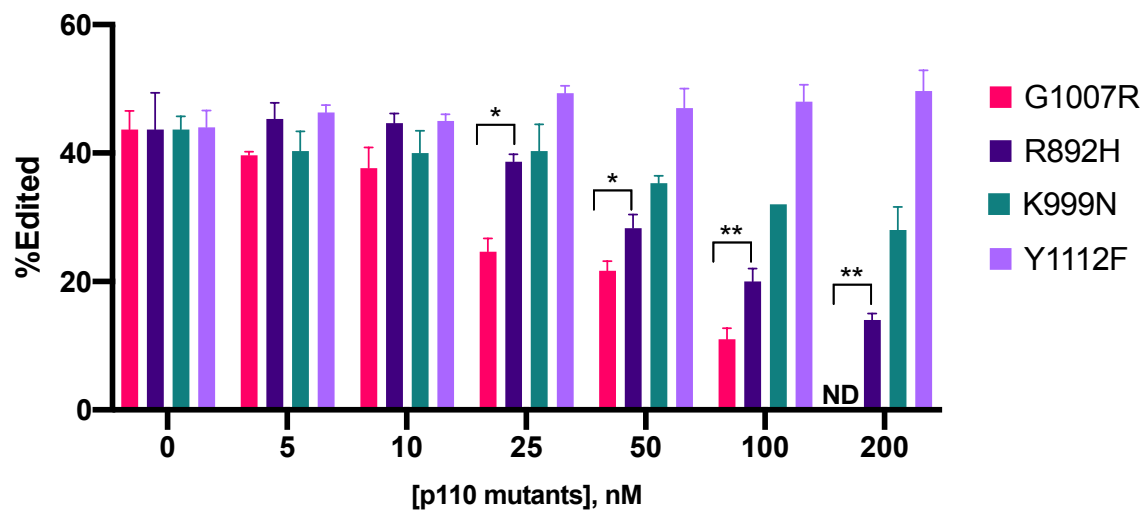

**Figure S6.** G1007R is a competitive inhibitor of ADAR1 p110 wild-type. Inhibition of ADAR1 p110 with select AGS mutants (G1007R, R892H, K999N and Y1112F) tested on the 5-HT<sub>2c</sub>R substrate. In vitro deamination was performed with 10nM substrate, 50 nM wild-type and 0, 5, 10, 25, 50, 100 and 200 nM p110 AGS mutants at 30°C. Reaction was initiated by the addition of substrate and quenched after 30 min. Error bars represent  $n \geq 3$  technical replicates.

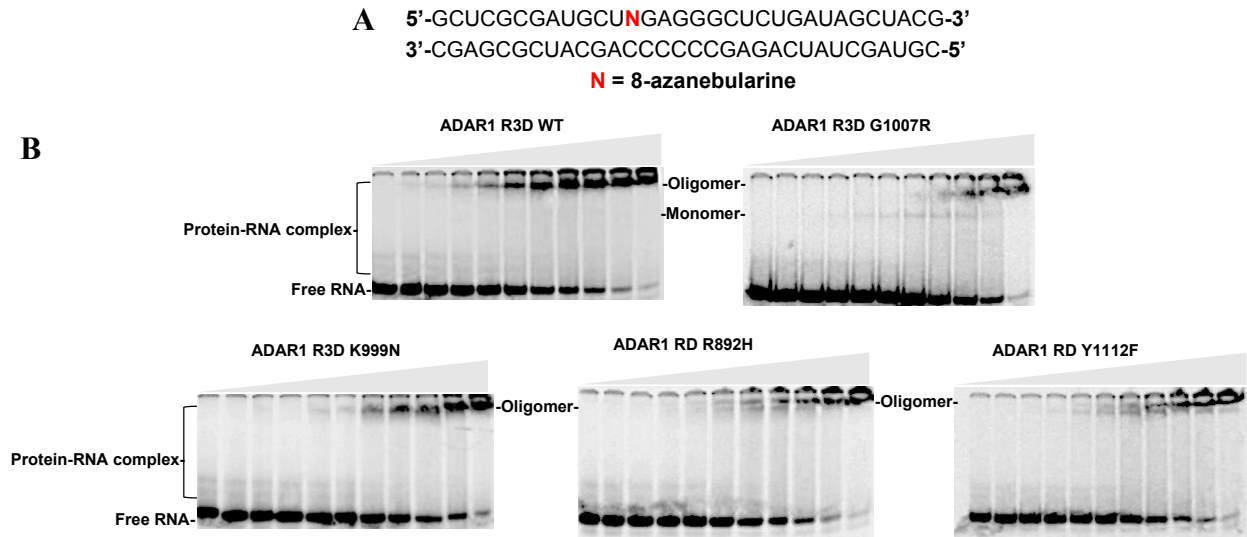

**Figure S7.** Binding of AGS mutants of ADAR1 R3D to a 32 bp duplex bearing 8-azanebularine (N) analyzed by quantitative EMSA. **(A)** Sequence of 32 bp duplex bearing 8-azanebularine (N). **(B)** Representative EMSA gels for ADAR1 R3D WT and AGS mutants (G1007R, K999N, R892H, and Y1112F). Reaction was performed at 1.1 nM 32 bp duplex and protein concentration was varied from 0 to 128 nM.

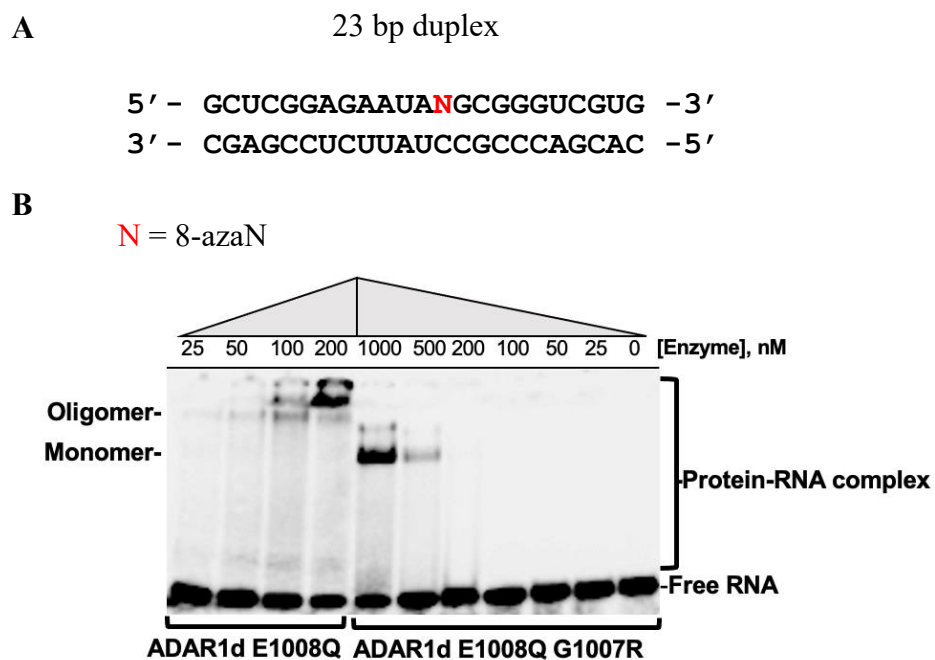

**Figure S8.** EMSA of ADAR1d E1008Q and ADAR1d E1008Q G1007R with a 23 bp duplex bearing 8-azaN. **A)** Sequence of 23 bp duplex used. **B)** EMSA gel with ADAR1d E1008Q and ADAR1d E1008Q G1007R. Reaction was performed at 5 nM 8-azaN-containing 23 bp duplex and protein concentrations [ADAR1d E1008Q]: 25 nM, 50 nM, 100 nM, 200 nM and [ADAR1d E1008Q G1007R]: 1000 nM, 500nM, 200 nM, 100nM, 50 nM and 25 nM.
